# Supplementary material for: Kocuria flava, a Bacterial Endophyte of the Marine Macroalga Bryopsis plumosa, Emits 8-Nonenoic Acid Which Inhibits the Aquaculture Pathogen Saprolegnia parasitica
Source: MDPI journal article supplement (doi:10.3390/md21090476), 2023-08-29
Supplement: s1 [file s1]

**Table S1:** Volatiles secreted by isolate ABp5 –additional information.

| COMPOUND                                      | SUPPLIER      | CAS NUMBER | CHEMICAL STRUCTURE*                                                                  |
|-----------------------------------------------|---------------|------------|--------------------------------------------------------------------------------------|
| Oxime-, methoxy-phenyl-                       | -             | 67160-14-9 | 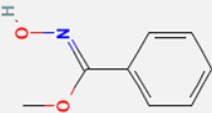  |
| 2-Propyl-1-pentanol                           | Alfa Aesar    | 58175-57-8 |   |
| 2-Nonanone                                    | Thermo Fisher | 821-55-6   |    |
| 2-Decanone                                    | Alfa Aesar    | 693-54-9   |    |
| 8-Nonenoic acid                               | Sigma-Aldrich | 31642-67-8 |   |
| 2-Undecanone                                  | Thermo Fisher | 112-12-9   |  |
| 2-Undecanol                                   | Alfa Aesar    | 1653-30-1  |  |
| 2-Dodecanone                                  | Alfa Aesar    | 6175-49-1  |  |
| 2-Tridecanone                                 | Thermo Fisher | 593-08-8   |  |
| 2,2,4-Trimethyl-1,3-pentanediol diisobutyrate | Thermo Fisher | 6846-50-0  |  |

\* National Center for Biotechnology Information (2023). PubChem Compound Summary.
